# Supplementary material for: Monoclonal Antibodies to S and N SARS-CoV-2 Proteins as Probes to Assess Structural and Antigenic Properties of Coronaviruses
Source: MDPI journal article supplement (doi:10.3390/v13101899), 2021-09-22

**Supplemental Figure S1.** Capture ELISA using mouse mAb S3.E (IgM isotype); detection using mouse mAbs. A sandwich ELISA was prepared by capturing mouse mAb S3.E using a goat-anti mouse IgM polyclonal antibody. S-RBD protein was captured by the mouse mAb S3.E, then the set of mouse mAbs to S-RBD (except S3.E) were added followed by detection secondary anti-mouse antibody (anti-IgG1, anti-IgG2a, anti-IgG2b) as determined by the detecting mAb isotype.

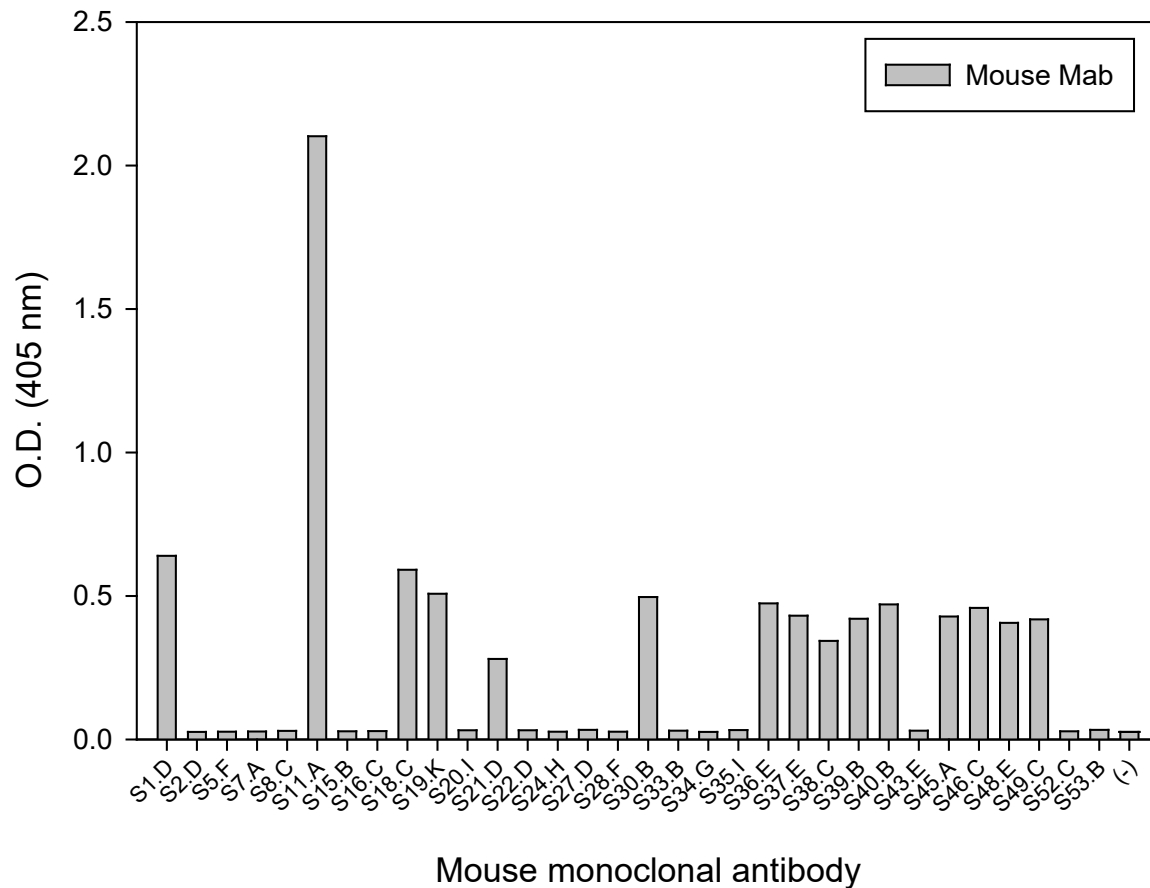

**Supplemental Figure S2.** Capture ELISA using 3 rabbit anti-S-RBD mAbs; detection using mouse mAbs. A sandwich ELISA was prepared by capturing 3 rabbit mAbs (mAbs #14, #24 and #77) using a goat-anti rabbit IgG polyclonal antibody. S-RBD protein was captured by the rabbit mAbs, then the set of mouse mAbs to S-RBD were added followed by detection with a secondary goat anti-mouse antibody (anti-IgG and anti-IgM).

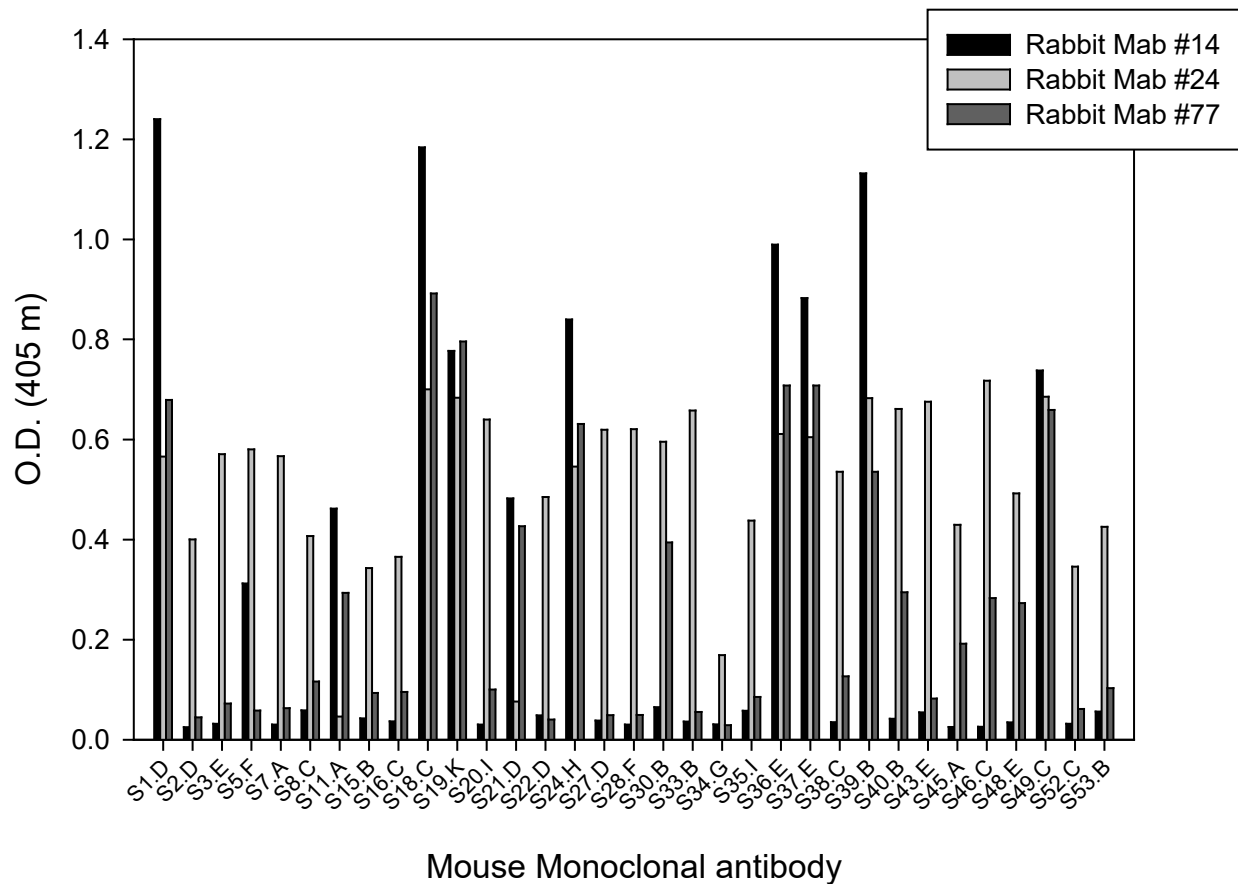

**Supplemental Figure S3.** Capture ELISA using select mouse mAbs; detection using rabbit mAbs. A sandwich ELISA was prepared by capturing selected mouse mAbs (S3.E, S8.C, S11.A, S18.C and S43.E) using isotype-specific goat-anti mouse polyclonal antibody. S-RBD protein was captured by the mouse mAbs, then three rabbit mAbs (#14, #24 and #77) to S-RBD were added followed by detection using a secondary anti-rabbit antibody.

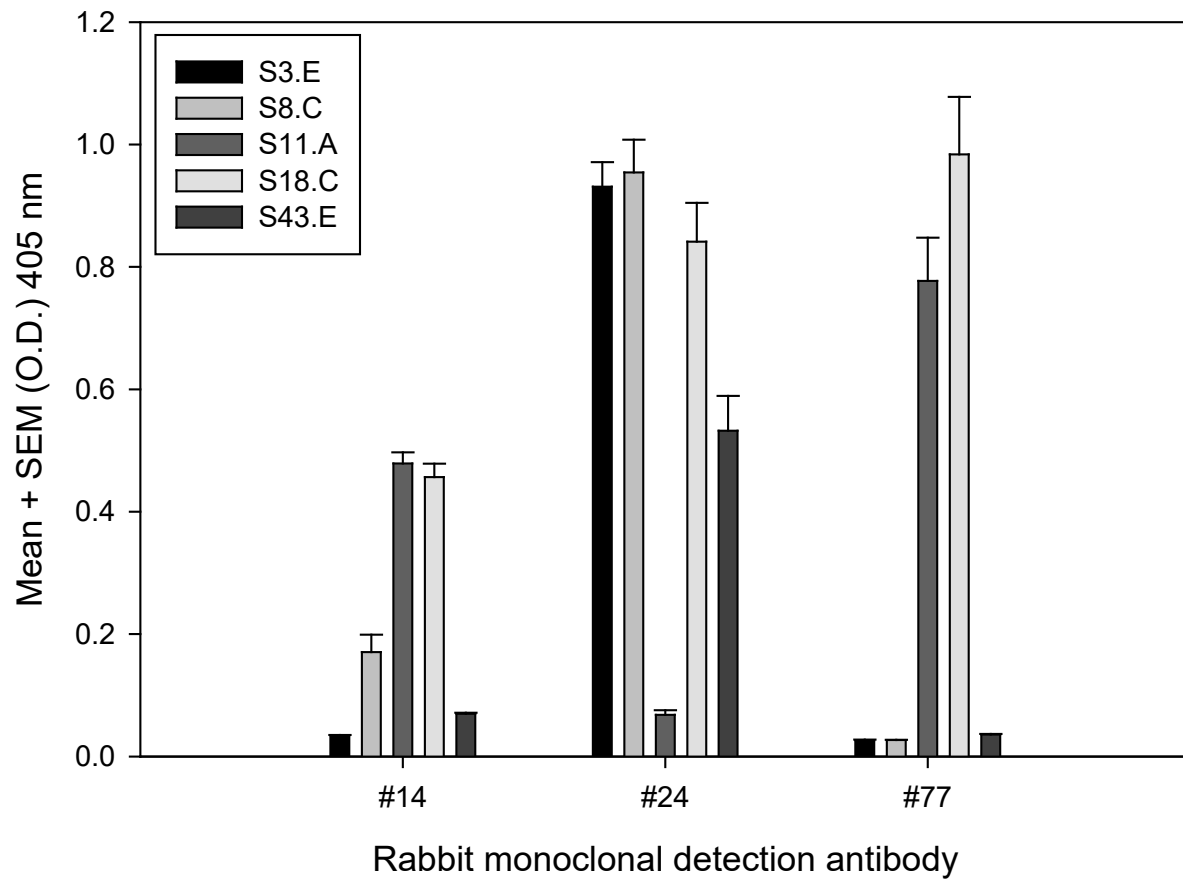

**Supplemental Figure S4.** Immunofluorescence of untransfected cells to show specificity of the N and S antibodies to their respective antigens. \* denotes untransfected cell next to stained transfected cell expressing S protein

### N Protein Antibody Specificity

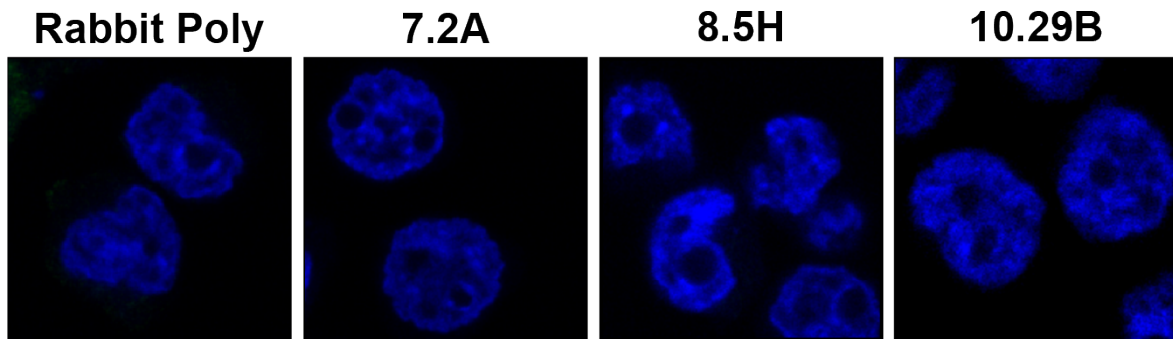

### S Protein Antibody Specificity

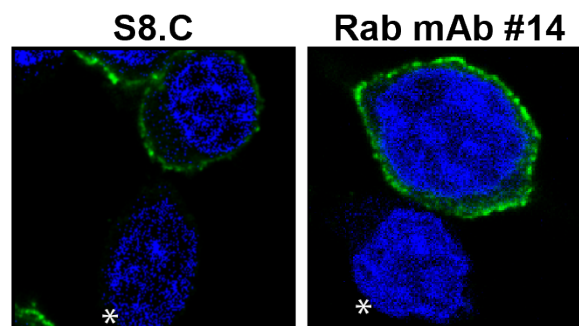

Supplement: s1 [file s1]
